# Supplementary material for: LAG-3 Inhibitory Receptor Expression Identifies Immunosuppressive Natural Regulatory Plasma Cells
Source: PubMed Central journal article supplement — Immunity. 2018 Jul 17;49(1):120–133.e9. doi: 10.1016/j.immuni.2018.06.007 (PMC6057275; doi:10.1016/j.immuni.2018.06.007), 2018-07-17
Supplement: mmc1.pdf [file mmc1.pdf]

## Supplemental Information

### LAG-3 Inhibitory Receptor Expression Identifies

### Immunosuppressive Natural Regulatory Plasma Cells

Andreia C. Lino, Van Duc Dang, Vicky Lampropoulou, Anna Welle, Jara Joedicke, Jelka Pohar, Quentin Simon, Jessie Thalmensi, Aurelia Baures, Vinciane Flühler, Imme Sakwa, Ulrik Stervbo, Stefanie Ries, Luc Jouneau, Pierre Boudinot, Takeshi Tsubata, Takahiro Adachi, Andreas Hutloff, Thomas Dörner, Ursula Zimmer-Strobl, Alex F. de Vos, Katja Dahlke, Gunnar Loh, Sarantis Korniotis, Christian Goosmann, Jean-Claude Weill, Claude-Agnès Reynaud, Stefan H.E. Kaufmann, Jörn Walter, and Simon Fillatreau

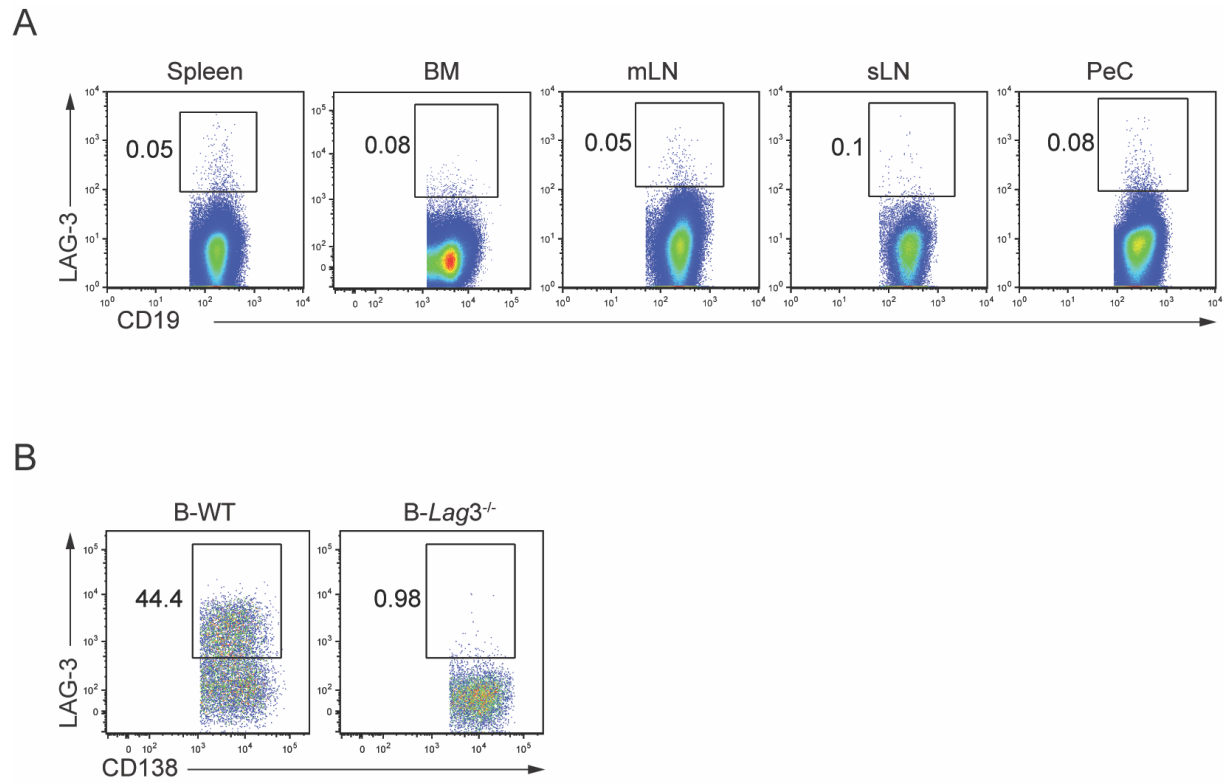

**Figure S1: Expression of LAG-3 by B cells and plasmacytes in *Salmonella* infected mice, Related to Figure 1.**

(A) Representative flow cytometry plots showing the expression of LAG-3 on CD19<sup>+</sup>CD138<sup>-</sup> B cells from C57BL/6 mice in spleen, BM, mLN, sLN, and PeC on day 1 p.i. with *Salmonella* (SL7207, 10<sup>7</sup> CFU).

(B) Representative flow cytometry plots showing the expression of LAG-3 on splenic CD138<sup>hi</sup> cells of B-WT and B-*Lag3*<sup>-/-</sup> mice on day 1 p.i. with *Salmonella* (SL7207, 10<sup>7</sup> CFU).

A

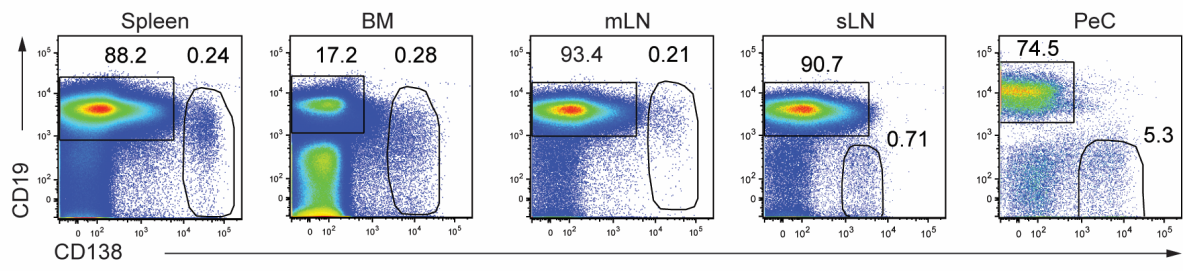

B

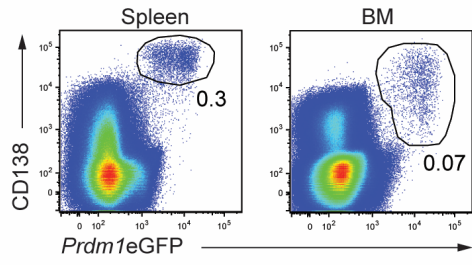

C

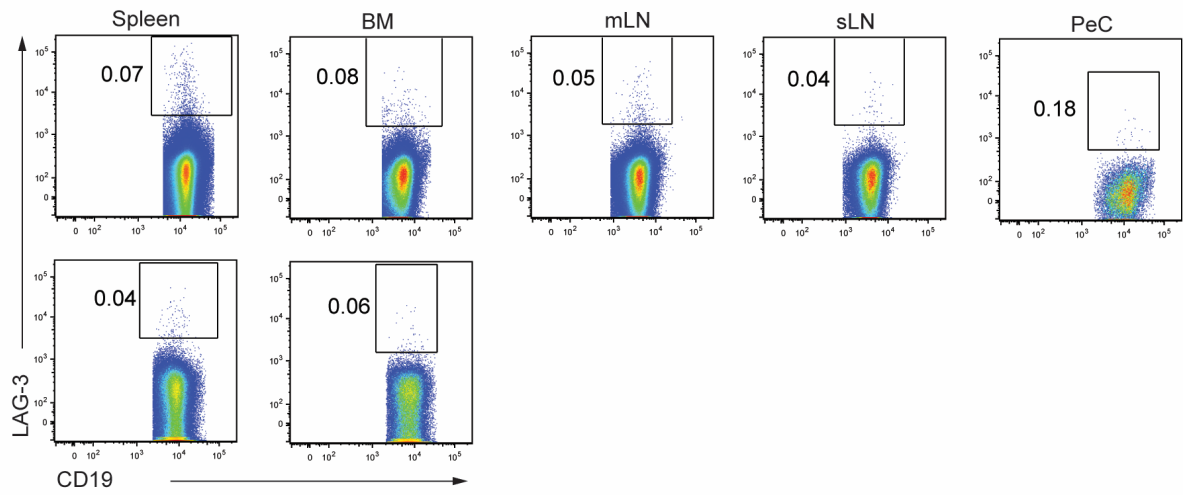

D

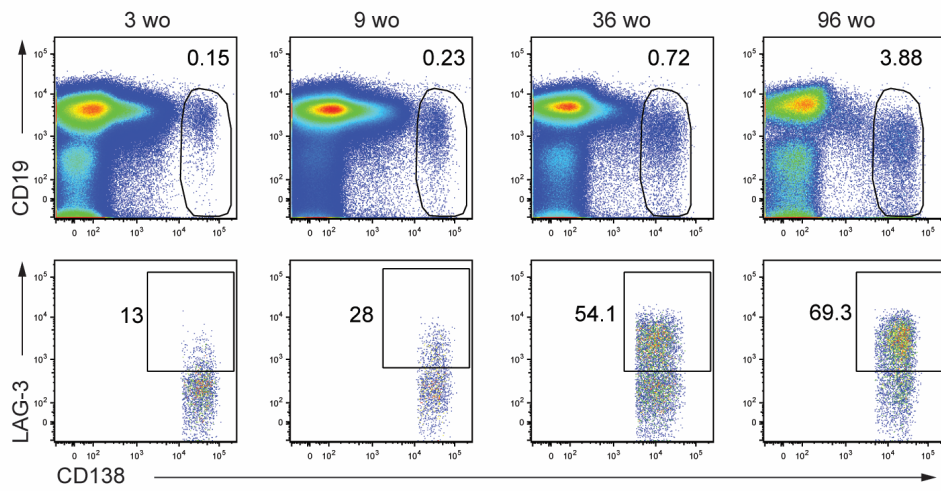

**Figure S2: Presence of LAG-3-expressing plasma cells in naïve mice, Related to Figure 2.**

(A) Representative flow cytometry plots showing the expression of CD19 and CD138 on live CD4<sup>+</sup>CD8<sup>-</sup> lymphocytes in the indicated tissues. The gates identify CD19<sup>+</sup>CD138<sup>-</sup> B cells characterized in Figure S2C, and CD138<sup>+/hi</sup> plasmocytes characterized in Figure 2A, for spleen, BM, mLN, sLN and PeC of naïve C57BL/6 mice.

(B) Representative flow cytometry plots showing the expression of CD138 and *Prdm1e*GFP on live CD4<sup>+</sup>CD8<sup>-</sup> lymphocytes from spleen and BM of naïve *Prdm1e*GFP mice. The gates identify CD138<sup>+/hi</sup>*Prdm1e*GFP<sup>+</sup> plasmocytes characterized in Figure 2B.

(C) Representative flow cytometry plots showing the expression of LAG-3 on CD19<sup>+</sup>CD138<sup>-</sup> B cells in spleen, BM, mLN, sLN, and PeC from naïve C57BL/6 mice (top), as well as in spleen and BM from naïve *Lag3*<sup>-/-</sup> mice (bottom).

(D) Representative flow cytometry plots showing the expression of CD19 and CD138 in live CD4<sup>+</sup>CD8<sup>-</sup> lymphocytes (top) and the expression of LAG-3 and CD138 in live CD138<sup>hi</sup> plasmocytes (bottom) from naïve C57BL/6 mice of indicated ages. The gates in top panels indicate CD138<sup>hi</sup> cells analysed for the expression of LAG-3 and CD138 in bottom panels.

A

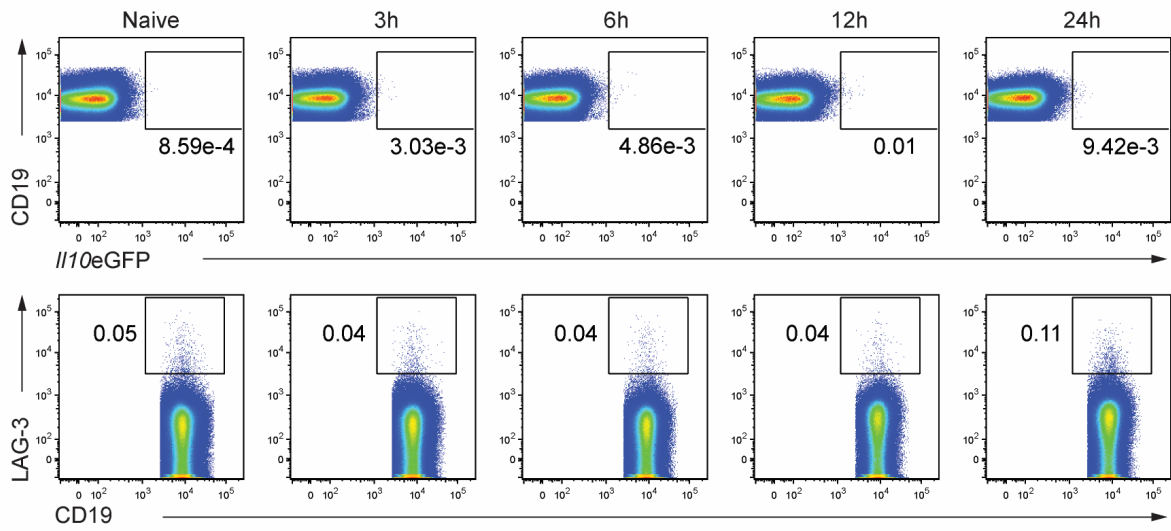

B

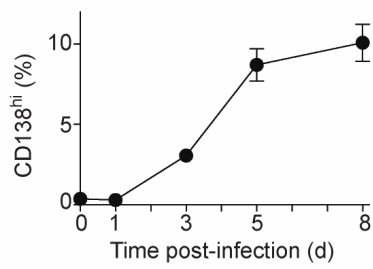

C

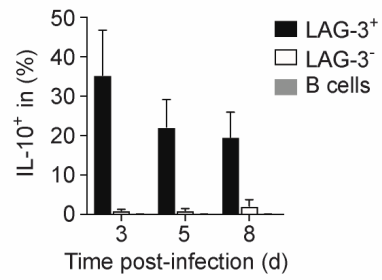

D

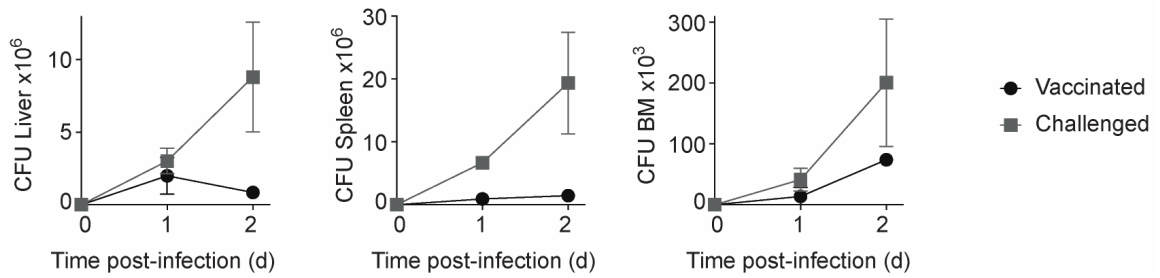

**Figure S3: Induction of IL-10 expression in LAG-3<sup>+</sup>CD138<sup>hi</sup> plasma cells during *Salmonella* infection, Related to Figure 3.**

(A) *Il10eGFP* mice were challenged with *Salmonella* (SL7207, 10<sup>7</sup> CFU), and spleens were analysed at indicated hours p.i. Representative flow cytometry plots showing the expression of *Il10eGFP* and CD19 (top), and the expression of LAG-3 and CD19 (bottom) on live CD19<sup>+</sup>CD138<sup>-</sup> B cells.

(B) *Il10eGFP* mice were challenged with *Salmonella* (SL7207, 10<sup>7</sup> CFU). Data show the frequency of CD138<sup>hi</sup> plasmacytes in CD4<sup>-</sup>CD8<sup>-</sup> live cells in spleen at indicated days p.i. Pool of two independent experiments with at least 6 mice per group.

(C) *Il10eGFP* mice were challenged with *Salmonella* (SL7207, 10<sup>7</sup> CFU), and spleens were analyzed at indicated days p.i. Data show frequencies of *Il10eGFP*<sup>+</sup> cells in CD19<sup>+</sup>CD138<sup>-</sup> (B cells), LAG-3<sup>+</sup>CD138<sup>hi</sup> (LAG-3<sup>+</sup>), and LAG-3<sup>-</sup>CD138<sup>hi</sup> (LAG-3<sup>-</sup>) cells. Pool of two independent experiments with at least 6 mice per group.

(D) *Il10eGFP* mice were vaccinated (SL7207, 10<sup>6</sup> CFU), and rechallenged 90 days later with *Salmonella* (SL7207, 10<sup>7</sup> CFU) together with naive age-matched control *Il10eGFP* mice. CFU were determined in liver (left), spleen (middle), and BM (right) at indicated days p.i. Data are pooled from two independent experiments with at least n=6 per group.

Data show mean ± SEM.

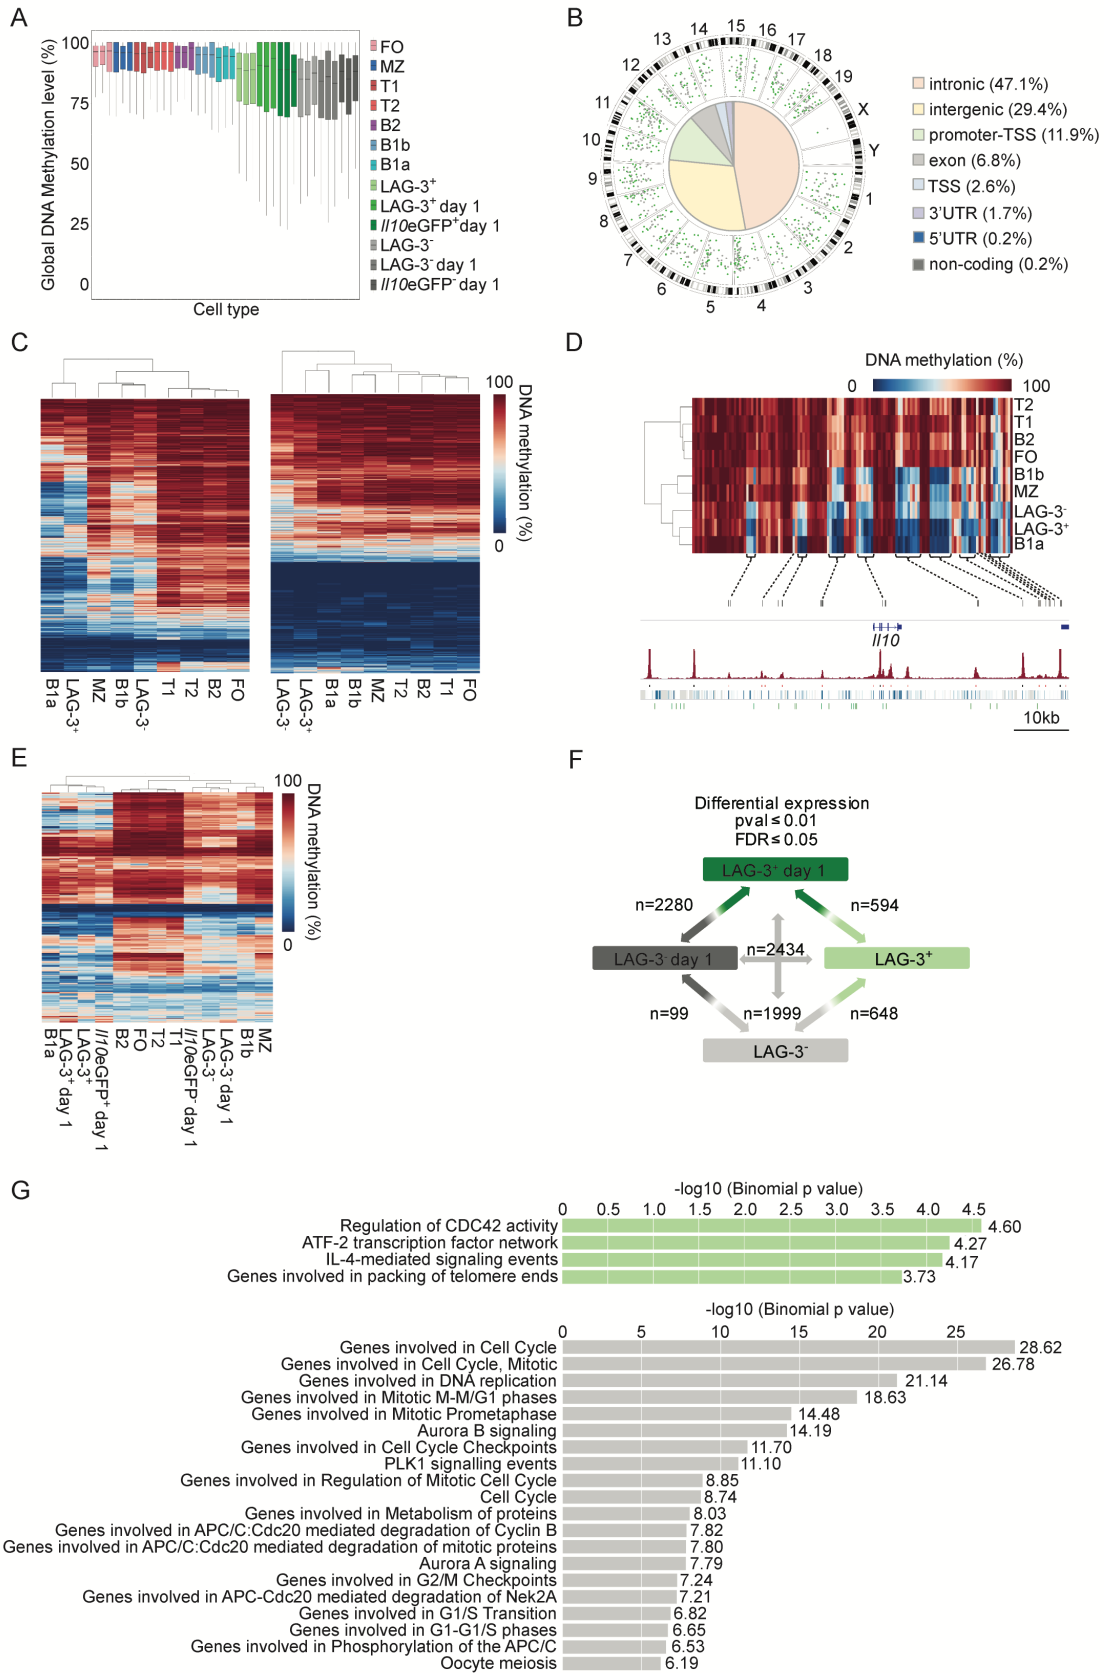

**Figure S4. Analysis of DNA methylation and gene expression, Related to Figure 4**

(A) Boxplot showing the genome-wide methylation percentage for the indicated B lineage cell subsets.

(B) Circular representation showing the distribution of the 469 DMR identified between LAG-3<sup>+</sup>CD138<sup>hi</sup> cells and LAG-3<sup>-</sup>CD138<sup>hi</sup> cells from naïve mice across the chromosomes and the genome. The methylation frequency for each DMR is indicated for LAG-3<sup>+</sup>CD138<sup>hi</sup> cells (green dots) and LAG-3<sup>-</sup>CD138<sup>hi</sup> cells (grey dots). The genomic positions of the DMR on the chromosomes are given by their angular value, and their methylation ratio are indicated by their height from the centre (radius). The pie chart shows the global distribution of the DMR within functional genomic regions.

(C) Heat-maps displaying the methylation percentage of each CpG found in the 469 DMR (see Figure 4B) that are hypo-methylated (left) or hyper-methylated (right) in LAG-3<sup>+</sup>CD138<sup>hi</sup> cells compared to LAG-3<sup>-</sup>CD138<sup>hi</sup> cells.

(D) Heat-map showing the methylation ratio for all covered CpG positions in the *Il10* locus for the indicated B lineage cell subsets, and additional genomic information, as in Figure 4D. In addition, the location of Egr2 motifs is indicated by green bars.

(E) Heat-map displaying the methylation ratio for the DMR distinguishing LAG-3<sup>+</sup>CD138<sup>hi</sup> cells and LAG-3<sup>-</sup>CD138<sup>hi</sup> cells from naïve mice for the indicated B lineage cell subsets.

(F) Representation of the numbers of DEG (p-value  $\leq 0.01$  and FDR  $\leq 0.05$ ) for the indicated pairwise comparisons. The union of the ensembles of DEG contains 3631 elements.

(G) Gene set enrichment analysis for the DEG between LAG-3<sup>+</sup>CD138<sup>hi</sup> cells and LAG-3<sup>-</sup>CD138<sup>hi</sup> cells from naïve mice (MSigDB Pathway ontology). Upper and lower panels were obtained using the genes expressed at higher amounts in LAG-3<sup>+</sup>CD138<sup>hi</sup> cells, and LAG-3<sup>-</sup>CD138<sup>hi</sup> cells, respectively.

(B-E) Coverage weighted average methylation ratio from 3 replicates for each cell type are shown.

(A, E, F) All samples were from naïve mice except where indicated. (B, C, D, G) All samples were from naïve mice.



**A**

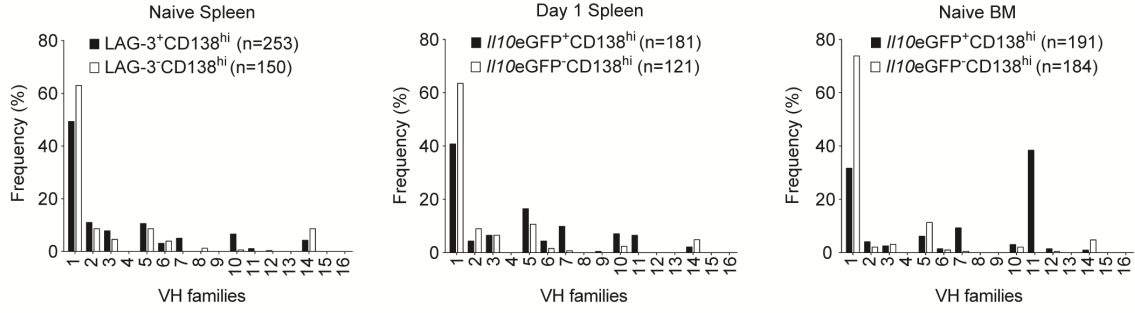

**B**

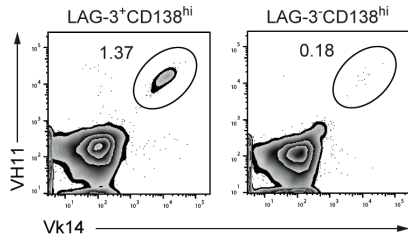

**C**

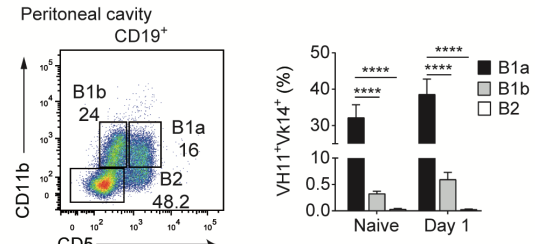

**D**

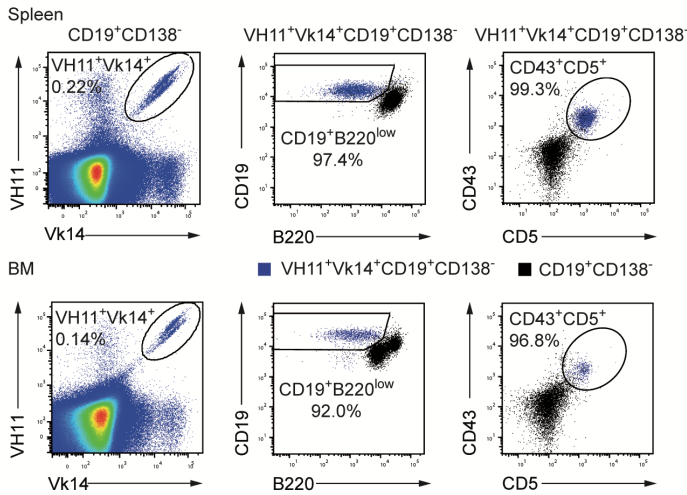

**E**

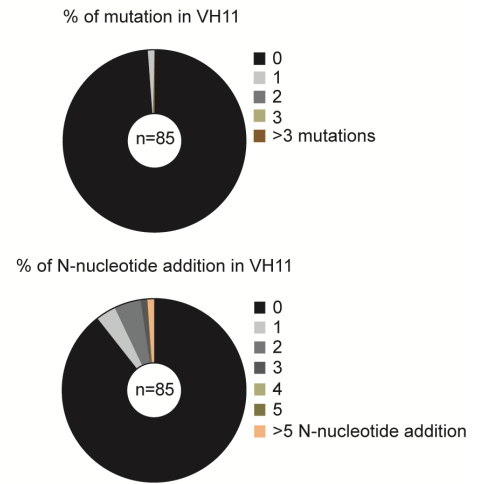

**F**

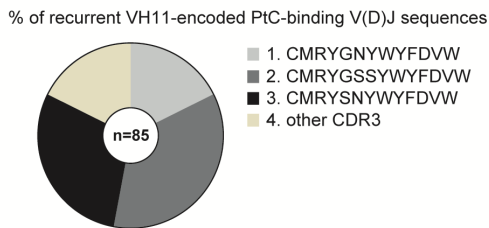

**G**

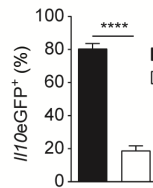

**H**

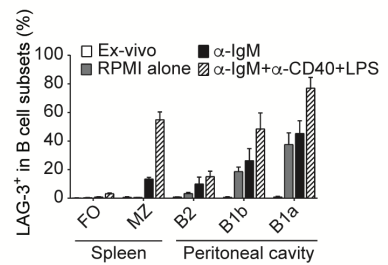

**I**

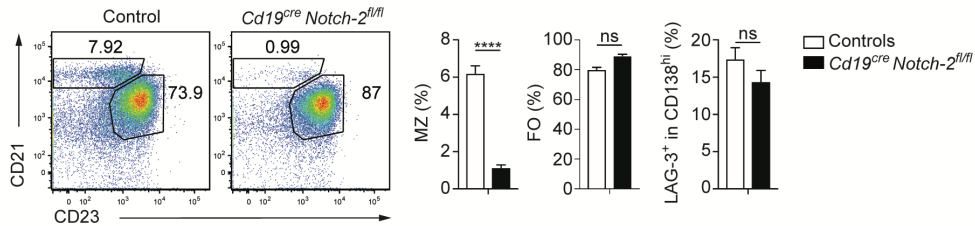

**Figure S5: BCR repertoire and antigen recognition properties of LAG-3- and IL-10-expressing plasmocytes, Related to Figure 5.**

- (A) Spleen LAG-3<sup>+</sup>CD138<sup>hi</sup> (naïve C57BL/6 mice, n=253) and LAG-3<sup>+</sup>CD138<sup>hi</sup> (naïve C57BL/6 mice, n=150), spleen *Il10*eGFP<sup>+</sup>CD138<sup>hi</sup> (day 1, n=181) and *Il10*eGFP<sup>-</sup>CD138<sup>hi</sup> (day 1, n=121), BM *Il10*eGFP<sup>+</sup>CD138<sup>hi</sup> (naïve, n=191) and *Il10*eGFP<sup>-</sup>CD138<sup>hi</sup> (naïve, n=184) plasmocytes were isolated from naïve and day 1-challenged mice (SL7207; 10<sup>7</sup> CFU). Their *Igh* rearrangements were obtained by single cell PCR, and analysed using IMGT/V-Quest. Data show the IGHV family gene usage for the indicated populations.
- (B) Representative flow cytometry plots showing the expression of VH11 and Vk14.126 on the indicated spleen cell populations from naïve (LAG-3<sup>+</sup>CD138<sup>hi</sup>, LAG-3<sup>-</sup>CD138<sup>hi</sup>) *Il10*eGFP mice.
- (C) Representative flow cytometry plots showing the gating strategy to identify B1a (CD19<sup>+</sup>CD11b<sup>+</sup>CD5<sup>+</sup>), B1b (CD19<sup>+</sup>CD11b<sup>+</sup>CD5<sup>-</sup>) and B2 (CD19<sup>+</sup>CD11b<sup>-</sup>CD5<sup>-</sup>) B cell subsets in PeC (gated on live CD19<sup>+</sup> B cells). The histogram indicates the frequency of VH11<sup>+</sup>Vk14.126<sup>+</sup> among B1a, B1b and B2 subsets in naïve and day 1-challenged *Il10*eGFP mice (SL7207, 10<sup>7</sup> CFU). Data are pooled from 2 independent experiments (n=6 per time point).
- (D) Representative flow cytometry plots showing the gating strategy to characterize VH11<sup>+</sup>Vk14.126<sup>+</sup> B1a cells in spleen (upper) and BM (bottom). Left plots show the expression of VH11 and Vk14.126 in CD19<sup>+</sup>CD138<sup>-</sup> B cells. Middle and right plots show the expression of CD19 and B220, as well as of CD43 and CD5, respectively, on VH11<sup>+</sup>Vk14.126<sup>+</sup>CD19<sup>+</sup>CD138<sup>-</sup> B cells from the spleen and BM of naïve C57BL/6 mice (in blue). The expression of these markers on CD19<sup>+</sup>CD138<sup>-</sup> B cells is indicated by the overlaid cells in black on the same plots. The percentages in the middle and right plots are the frequencies of CD19<sup>+</sup>CD138<sup>-</sup>VH11<sup>+</sup>Vk14.126<sup>+</sup> having the expression of CD19 and B220, as well as of CD43 and CD5, falling within the gates. Data is representative of 2 independent experiments.
- (E) Frequency of IgH sequences having the indicated numbers of somatic mutations (top) or N-nucleotide additions (bottom) among all obtained VH11-positive sequences in spleen and BM from naïve and challenged mice.
- (F) Frequency of IgH CDR3 sequences associated with PtC binding among all obtained VH11-positive IgH sequences in spleen and BM from naïve and challenged mice.
- (G) Frequency of *Il10*eGFP<sup>+</sup> cells within PtC- and non-PtC-reactive CD138<sup>hi</sup> in BM from naïve *Il10*eGFP mice. Data are pooled from 4 independent experiments (n=12).
- (H) LAG-3 expression on B cell subsets *ex vivo*, and after overnight culture (RPMI, αIgM, αIgM+αCD40+LPS). Pools of 2-3 experiments.
- (I) Flow cytometry plots and quantification of spleen B cell subsets in naïve *Cd19-cre-Notch2<sup>fl/fl</sup>* mice (n=7) and littermate controls (pooled *Cd19-cre* and *Notch2<sup>fl/fl</sup>*, n=8). Pool of 2 experiments (n=6). Data show mean ± SEM. Results were compared using two-tailed unpaired t-test with Welch's correction in case of unequal variances (\*\*\*\* p<0.0001).

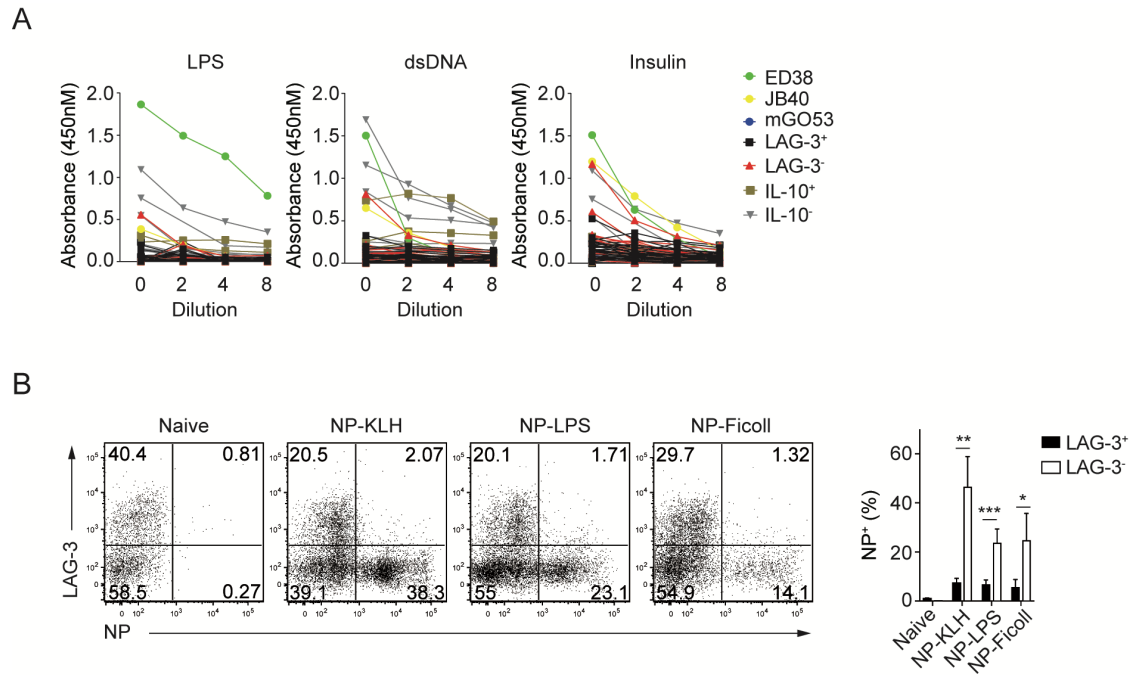

**Figure S6: Reactivity of plasmocytes, Related to Figure 6.**

(A) Reactivity of recombinant immunoglobulin from spleen LAG-3<sup>+</sup> (n=25) and LAG-3<sup>-</sup> (n=19), and BM *Il10*eGFP<sup>+</sup> (n=6) as well as *Il10*eGFP<sup>-</sup> (n=14) plasmocytes for LPS, dsDNA and insulin by ELISA. Green, yellow and blue lines are high positive ED38, low positive JB40, and negative control mGO53 antibodies, respectively.

(B) Flow cytometry plots showing binding of NP-allophycocyanin and expression of LAG-3 on CD138<sup>hi</sup> cells from spleen of naive and i.p. immunized mice (day 7 p.i.). Frequency of NP-binding cells within LAG-3<sup>+</sup>CD138<sup>hi</sup> and LAG-3<sup>-</sup>CD138<sup>hi</sup> spleen cells. Representative of 2 experiments (n=6). Data show mean  $\pm$  SEM (\*p<0.05, \*\*p<0.01; \*\*\* p<0.001)

**A**

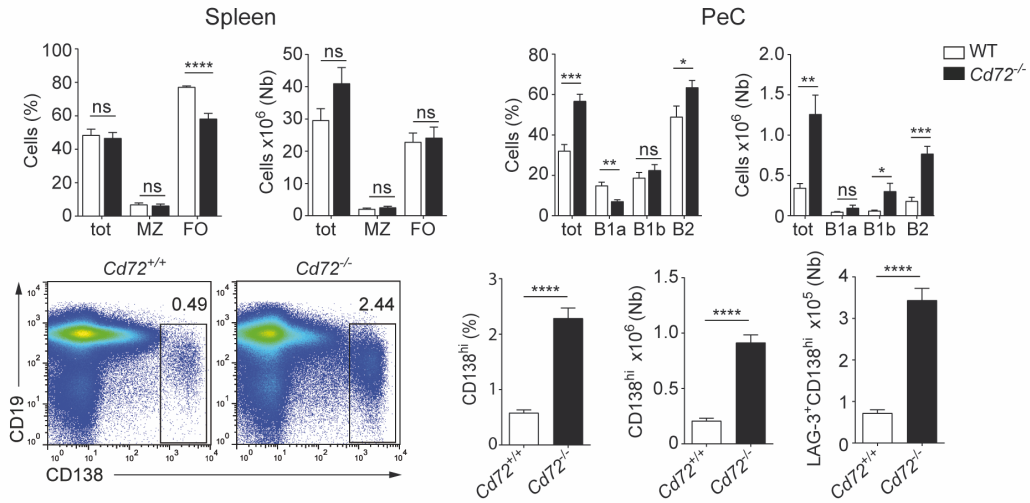

**B**

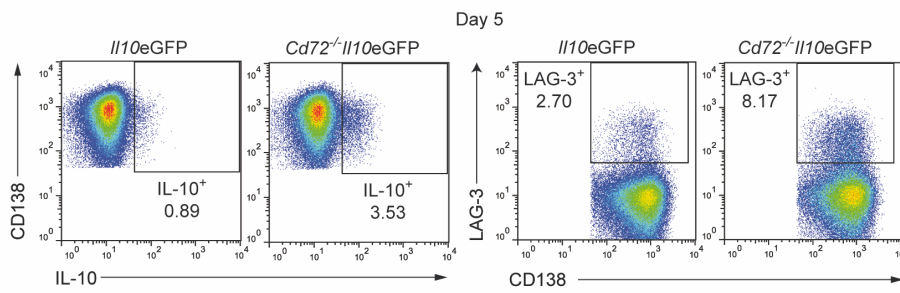

**C**

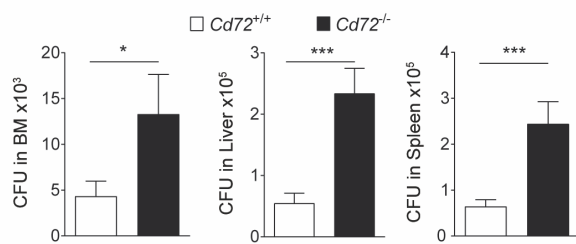

**D**

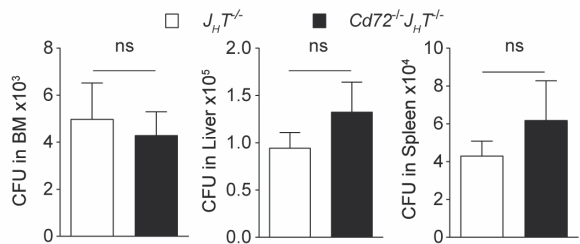

**E**

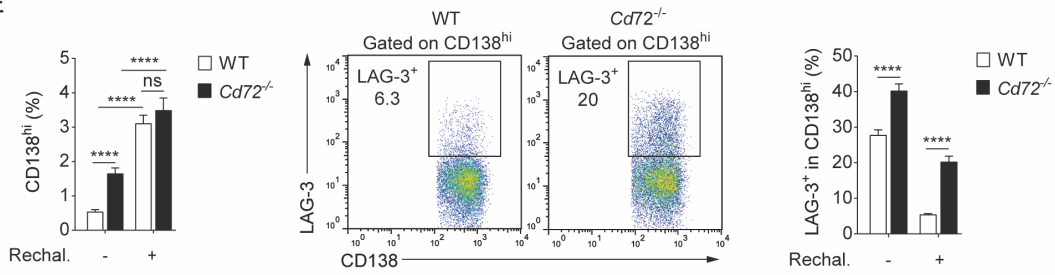

**F**

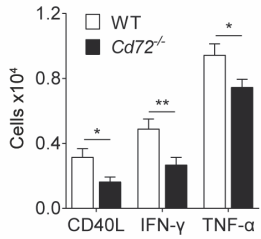

**G**

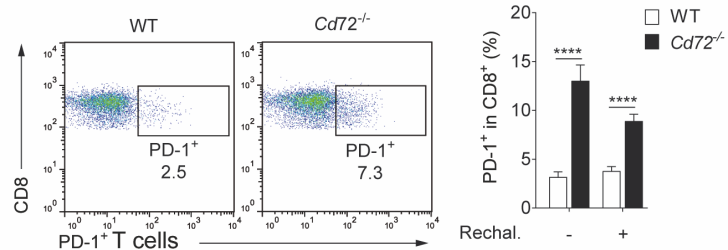

**Figure S7: Host response of CD72-deficient mice during *Salmonella* infection, Related to Figure 7.**

(A) Frequencies and numbers of total (tot) and indicated B cell subsets in spleen and PeC of naïve *Cd72*<sup>-/-</sup> and control mice. Pool of 2 experiments (n=6) (top). Flow cytometry plots and quantifications for CD138<sup>hi</sup> and LAG-3<sup>+</sup>CD138<sup>hi</sup> cells in spleen of naïve *Cd72*<sup>-/-</sup> and littermate control. Pool of 3 experiments (n=13) (bottom).

(B) *Il10eGFP* and *Cd72*<sup>-/-</sup>*Il10eGFP* shown in Figure 7A. Representative flow cytometry plots showing the expression of *Il10eGFP* and LAG-3 by CD138<sup>hi</sup> cells at day 5 p.i. Data are representative from 3 independent experiments (n=9-12 per group).

(C) CFU on day 3 p.i. (SL1344, 100 CFU) for *Cd72*<sup>-/-</sup> and littermate controls. Pool of 5 experiments (n=22-25 per group)

(D) *Cd72*<sup>-/-</sup>JHT (n=11) and JHT (n=10) mice were challenged with *Salmonella* (SL1344, 100 CFU). Data show CFU in BM, liver, and spleen on day 3 p.i. Data are pooled from 2 independent experiments.

(E) *Cd72*<sup>-/-</sup> and WT mice shown in Figure 7E. Histogram (left) shows the frequency of CD138<sup>hi</sup> cells in spleen before (day 90) and 5 days after re-challenge. Representative flow cytometry plots show the expression of LAG-3 in spleen CD138<sup>hi</sup> cells on day 5 after re-challenge (middle). Histogram (right) shows the frequency of LAG-3<sup>+</sup> cells in CD138<sup>hi</sup> cells in spleen on day 90 and day 5 after rechallenge.

(F) *Cd72*<sup>-/-</sup> and WT mice shown in Figure 7G. Numbers of CD40L-, IFN- $\gamma$ -, and TNF- $\alpha$ -expressing *Salmonella*-reactive memory CD4<sup>+</sup> T cells in BM on day 90 post-vaccination.

(G) *Cd72*<sup>-/-</sup> and WT mice shown in Figure 7H. Representative flow cytometry plots (day 95) and quantifications showing the frequency of PD-1<sup>+</sup> cell in spleen CD8<sup>+</sup> T cells on days 90 and 95.

Data show mean  $\pm$  SEM. (n.s.p > 0.05, \*p<0.05, \*\*p<0.01; \*\*\*\* p<0.0001).

**Table S1. Top 50 genes that are higher expressed in naïve CD138<sup>hi</sup>CD19<sup>+</sup>LAG-3<sup>+</sup> cells compared to naïve CD138<sup>hi</sup>CD19<sup>+</sup>LAG-3<sup>-</sup> cells. Related to Figure 4.**

| Pvalue based top 50 genes that are higher expressed in naïve CD138 <sup>hi</sup> CD19 <sup>+</sup> LAG-3 <sup>+</sup> compared to naïve CD138 <sup>hi</sup> CD19 <sup>+</sup> LAG-3 <sup>-</sup> |             |       |          |          |                                                                                                 |
|--------------------------------------------------------------------------------------------------------------------------------------------------------------------------------------------------|-------------|-------|----------|----------|-------------------------------------------------------------------------------------------------|
| Rank                                                                                                                                                                                             | Gene symbol | logFC | PValue   | FDR      | Synonyms                                                                                        |
| 1                                                                                                                                                                                                | Lag3        | 4.91  | 1.33E-07 | 0.001528 | CD223 LAG-3 Ly66                                                                                |
| 2                                                                                                                                                                                                | Cpq         | 2.35  | 8.83E-07 | 0.002004 | 1190003P12Rik 2610034C17Rik Hls2 Lal-1 Pgcp                                                     |
| 3                                                                                                                                                                                                | Vav3        | 1.96  | 1.16E-06 | 0.002004 | A530094I06Rik AA986410 Idd18.1                                                                  |
| 4                                                                                                                                                                                                | Bcl2        | 1.67  | 1.4E-06  | 0.002004 | AW986256 Bcl-2 C430015F12Rik D630044D05Rik D830018M01Rik                                        |
| 5                                                                                                                                                                                                | Zfp3611     | 2.05  | 1.71E-06 | 0.002178 | AW742437 AW743212 Berg36 Brf1 D530020L18Rik ERF1 TIS11b cMG1                                    |
| 6                                                                                                                                                                                                | Egr1        | 1.95  | 2.04E-06 | 0.002343 | A530045N19Rik ETR103 Egr-1 Krox-1 Krox-24 Krox24 NGF1-A NGF1-A NGFIA TIS8 Zenk Zfp-6 Zif268 egr |
| 7                                                                                                                                                                                                | Inpp4a      | 1.89  | 3.49E-06 | 0.002981 | 107kDa 9630012D15 D130048C09Rik R74740                                                          |
| 8                                                                                                                                                                                                | Kctd12      | 1.45  | 3.66E-06 | 0.002981 | AU046135 AW538430 Pfet1 Pfetin                                                                  |
| 9                                                                                                                                                                                                | Prg2        | 1.84  | 4.22E-06 | 0.002981 | EMBP MBP mMBP mMBP-1                                                                            |
| 10                                                                                                                                                                                               | Il4i1       | 2.70  | 4.59E-06 | 0.002981 | Fig1 Fig1-ps LAAO LAO                                                                           |
| 11                                                                                                                                                                                               | Sema6d      | 1.91  | 4.65E-06 | 0.002981 | 1110067B02Rik AA409156 D330011G23 mKIAA1479                                                     |
| 12                                                                                                                                                                                               | Otud1       | 1.90  | 5.44E-06 | 0.003125 | 4933428L19Rik                                                                                   |
| 13                                                                                                                                                                                               | Bcl2l15     | 1.96  | 6.53E-06 | 0.003273 | Bfk Gm566                                                                                       |
| 14                                                                                                                                                                                               | Ppfibp2     | 1.45  | 6.68E-06 | 0.003273 | Cclp1                                                                                           |
| 15                                                                                                                                                                                               | Sirpa       | 1.32  | 7.47E-06 | 0.003273 | A1835480 Bit CD172a P84 Ptpps1 SHP-1 SHPS-1 SIRP                                                |
| 16                                                                                                                                                                                               | Sell        | 2.59  | 7.49E-06 | 0.003273 | A1528707 CD62L L-selectin LECAM-1 Lnhrl Ly-22 Ly-m22 Lyam-1 Lyam1                               |
| 17                                                                                                                                                                                               | Jade2       | 1.31  | 8.61E-06 | 0.003273 | 1200017K05Rik AI480685 Phf15 mKIAA0239                                                          |
| 18                                                                                                                                                                                               | Krt222      | 1.45  | 9.23E-06 | 0.003273 | 6330509G02Rik                                                                                   |
| 19                                                                                                                                                                                               | AW112010    | 1.97  | 9.69E-06 | 0.003273 | -                                                                                               |
| 20                                                                                                                                                                                               | Klf4        | 1.94  | 9.72E-06 | 0.003273 | EZF Gklf Zie                                                                                    |
| 21                                                                                                                                                                                               | Rgcc        | 1.52  | 1.04E-05 | 0.003273 | 1190002H23Rik Rgc-32 Rgc32                                                                      |
| 22                                                                                                                                                                                               | Vegfa       | 2.01  | 1.06E-05 | 0.003273 | Vegf Vpf                                                                                        |
| 23                                                                                                                                                                                               | Bhlhe40     | 2.58  | 1.08E-05 | 0.003273 | Bhlhb2 C130042M06Rik CR8 Clast5 Dec1 Shar p2 Stra13 Stra14                                      |
| 24                                                                                                                                                                                               | Ggh         | 2.00  | 1.18E-05 | 0.00346  | gamma-GH                                                                                        |
| 25                                                                                                                                                                                               | Oosp2       | 1.62  | 1.44E-05 | 0.003949 | Gm99 Plac11 Tmem122                                                                             |
| 26                                                                                                                                                                                               | Ly6k        | 1.67  | 1.48E-05 | 0.003951 | 2410015A16Rik 3110035B01Rik mLy-6K                                                              |
| 27                                                                                                                                                                                               | Cd200       | 1.65  | 1.77E-05 | 0.004608 | Mox2 OX2                                                                                        |
| 28                                                                                                                                                                                               | Serpina3f   | 1.45  | 2.06E-05 | 0.005062 | 2A1 BC049975                                                                                    |
| 29                                                                                                                                                                                               | Plekha1     | 1.24  | 2.13E-05 | 0.005062 | AA960558 C920009D07Rik TAPP1                                                                    |
| 30                                                                                                                                                                                               | Nfkbiz      | 1.12  | 2.22E-05 | 0.005062 | AA408868 INAP Mail                                                                              |
| 31                                                                                                                                                                                               | Ackr3       | 1.92  | 2.25E-05 | 0.005062 | AW541270 CXC-R7 CXCR-7 Cmkor1 Cxcr7 RDC-1 Rdc1                                                  |
| 32                                                                                                                                                                                               | Rnf130      | 1.47  | 2.42E-05 | 0.005351 | 2510042A13Rik G1RZFP G1rp GOLIATH GP                                                            |
| 33                                                                                                                                                                                               | Snn         | 1.14  | 2.87E-05 | 0.006151 | 2810407J07Rik AI848521 AW547286                                                                 |
| 34                                                                                                                                                                                               | Egr2        | 2.55  | 0.00003  | 0.006272 | Egr-2 Krox-20 Krox20 NGF1-B Zfp-25 Zfp-6                                                        |
| 35                                                                                                                                                                                               | Phlda1      | 1.47  | 3.24E-05 | 0.006652 | DT1P1B11 TDAG51 Tdag                                                                            |
| 36                                                                                                                                                                                               | Il10        | 1.57  | 3.48E-05 | 0.006801 | CSIF Il-10                                                                                      |
| 37                                                                                                                                                                                               | Ephx1       | 1.93  | 3.76E-05 | 0.007191 | EH Eph-1 Eph1 Ephx1 mEH                                                                         |
| 38                                                                                                                                                                                               | AB124611    | 1.49  | 5.07E-05 | 0.008396 | Gm1706                                                                                          |
| 39                                                                                                                                                                                               | Btla        | 1.34  | 0.000056 | 0.008941 | A630002H24                                                                                      |

|    |         |      |          |          |                                                         |
|----|---------|------|----------|----------|---------------------------------------------------------|
| 40 | Irf2bp2 | 1.15 | 5.77E-05 | 0.009071 | E130305N23Rik IRF-2BP2                                  |
| 41 | Clec2i  | 1.80 | 5.85E-05 | 0.00908  | Clr-g Clrg Dcl1 LCL-1 OCILrP2                           |
| 42 | Pglyrp1 | 1.31 | 6.71E-05 | 0.009416 | PGRP PGRP-S Pglyrp Tag7 Tasg7 Tnfsf3l                   |
| 43 | Abhd6   | 1.49 | 6.95E-05 | 0.009616 | 0610041D24Rik AA673485 AV065425                         |
| 44 | Srsf7   | 0.89 | 0.000073 | 0.009846 | 35kDa 9430065L19Rik 9G8 NX-96 Sfrs7                     |
| 45 | Egfl    | 3.38 | 7.36E-05 | 0.009846 | Dffrx Fam Egf-1 Egfa                                    |
| 46 | Ctss    | 1.32 | 0.000077 | 0.010022 | Cats                                                    |
| 47 | Twsg1   | 1.26 | 7.88E-05 | 0.010022 | 1810013J15Rik 9030422N06Rik AW552143 D17Ert403e Tsg Twg |
| 48 | Zswim6  | 1.46 | 7.94E-05 | 0.010022 | 2900036G02Rik mKIAA1577                                 |
| 49 | Gpr18   | 1.49 | 8.27E-05 | 0.010103 | -                                                       |
| 50 | Rtp4    | 1.62 | 8.39E-05 | 0.010104 | 5830458K16Rik Ifrg28                                    |

Abbreviations

|       |                      |
|-------|----------------------|
| LogFC | Log2 of fold change  |
| FDR   | False Discovery Rate |

**Table S2. Top 50 genes that are higher expressed in naïve CD138<sup>hi</sup>CD19<sup>+</sup>LAG-3<sup>-</sup> cells compared to naïve CD138<sup>hi</sup>CD19<sup>+</sup>LAG-3<sup>+</sup> cells. Related to Figure 4.**

| Pvalue based top 50 genes that are higher expressed in naïve CD138 <sup>hi</sup> CD19 <sup>+</sup> LAG-3 <sup>-</sup> compared to naïve CD138 <sup>hi</sup> CD19 <sup>+</sup> LAG-3 <sup>+</sup> |             |       |          |          |                                                     |
|--------------------------------------------------------------------------------------------------------------------------------------------------------------------------------------------------|-------------|-------|----------|----------|-----------------------------------------------------|
| Rank                                                                                                                                                                                             | Gene symbol | logFC | PValue   | FDR      | Synonyms                                            |
| 1                                                                                                                                                                                                | Ighe        | -4.86 | 5.86E-07 | 0.002004 | NA                                                  |
| 2                                                                                                                                                                                                | Ighg3       | -2.79 | 7.65E-07 | 0.002004 | NA                                                  |
| 3                                                                                                                                                                                                | Cdk1        | -1.76 | 9.26E-07 | 0.002004 | Cdc2 Cdc2a p34<CDC2>                                |
| 4                                                                                                                                                                                                | Mcm5        | -1.81 | 1.25E-06 | 0.002004 | AA617332 AI324988 AL033333 Cdc46 Mcnd5 P1-CDC46     |
| 5                                                                                                                                                                                                | Cdc45       | -2.12 | 3.06E-06 | 0.002981 | Cdc45l                                              |
| 6                                                                                                                                                                                                | Kpna2       | -1.41 | 0.000004 | 0.002981 | 2410044B12Rik IPOA1 PTAC58 Rch1                     |
| 7                                                                                                                                                                                                | Ada         | -1.14 | 4.83E-06 | 0.002981 | -                                                   |
| 8                                                                                                                                                                                                | Ighg2c      | -3.01 | 4.93E-06 | 0.002981 | NA                                                  |
| 9                                                                                                                                                                                                | Eno1        | -1.34 | 5.79E-06 | 0.003164 | 0610008I15 AL022784 Eno-1 MBP-1                     |
| 10                                                                                                                                                                                               | Ncapg       | -1.84 | 8.08E-06 | 0.003273 | 5730507H05Rik Hcapg MFT.M05.13                      |
| 11                                                                                                                                                                                               | Rrm2        | -1.63 | 8.94E-06 | 0.003273 | AA407299 R2                                         |
| 12                                                                                                                                                                                               | Kif11       | -1.64 | 9.79E-06 | 0.003273 | Eg5 Kif8 Kif11 Kns1                                 |
| 13                                                                                                                                                                                               | Slpi        | -2.10 | 9.81E-06 | 0.003273 | -                                                   |
| 14                                                                                                                                                                                               | Ighg2b      | -2.66 | 1.03E-05 | 0.003273 | NA                                                  |
| 15                                                                                                                                                                                               | Ccnb2       | -1.69 | 1.04E-05 | 0.003273 | CycB2                                               |
| 16                                                                                                                                                                                               | Nuf2        | -2.30 | 1.26E-05 | 0.003614 | 2410003C07Rik AU044112 C85691 Cdc41 NUF2R           |
| 17                                                                                                                                                                                               | Cep55       | -1.82 | 0.000014 | 0.003929 | 1200008O12Rik 2700032M20Rik                         |
| 18                                                                                                                                                                                               | Spc24       | -2.04 | 1.88E-05 | 0.004793 | 2410030K01Rik AV109292 Spbc24                       |
| 19                                                                                                                                                                                               | Rfc4        | -1.21 | 0.000021 | 0.005062 | A1 AI894123 AU040575 RFC37                          |
| 20                                                                                                                                                                                               | Nmral1      | -1.27 | 2.18E-05 | 0.005062 | 1110025F24Rik AI256624                              |
| 21                                                                                                                                                                                               | Ssr2        | -1.57 | 2.89E-05 | 0.006151 | 1500032E05Rik AI315033 AU020133 TLAP TRAPB TRAPbeta |
| 22                                                                                                                                                                                               | Prelid1     | -1.00 | 3.35E-05 | 0.006744 | 2610524G07Rik Preli                                 |
| 23                                                                                                                                                                                               | Cdkn3       | -1.82 | 3.49E-05 | 0.006801 | 2410006H10Rik KAP                                   |
| 24                                                                                                                                                                                               | Cdc20       | -1.83 | 4.37E-05 | 0.008221 | 2310042N09Rik C87100 p55CDC                         |
| 25                                                                                                                                                                                               | Tg          | -1.33 | 4.74E-05 | 0.008396 | Tgn cog                                             |
| 26                                                                                                                                                                                               | Selm        | -1.17 | 4.78E-05 | 0.008396 | 1500040L08Rik A230103K18 Selm Sepm                  |
| 27                                                                                                                                                                                               | Ighv1-63    | -2.70 | 4.86E-05 | 0.008396 | NA                                                  |
| 28                                                                                                                                                                                               | Ddost       | -1.15 | 4.97E-05 | 0.008396 | -                                                   |
| 29                                                                                                                                                                                               | Ahey        | -1.19 | 5.06E-05 | 0.008396 | AA987153 AL024110 CuBP SAHH                         |
| 30                                                                                                                                                                                               | Igkv4-69    | -1.91 | 0.000051 | 0.008396 | NA                                                  |
| 31                                                                                                                                                                                               | NA          | -3.48 | 5.12E-05 | 0.008396 | NA                                                  |
| 32                                                                                                                                                                                               | Ighv1-75    | -4.83 | 5.12E-05 | 0.008396 | NA                                                  |
| 33                                                                                                                                                                                               | Top2a       | -1.38 | 5.61E-05 | 0.008941 | Top-2                                               |
| 34                                                                                                                                                                                               | Ighv15-2    | -6.47 | 6.09E-05 | 0.009245 | NA                                                  |
| 35                                                                                                                                                                                               | Tigit       | -1.83 | 6.12E-05 | 0.009245 | ENSMUSG00000071552 Vstm3                            |
| 36                                                                                                                                                                                               | H2-Eb1      | -0.87 | 6.34E-05 | 0.009363 | Eb H-2Eb H2Eb Ia-4 Ia4                              |
| 37                                                                                                                                                                                               | Spc25       | -1.26 | 6.39E-05 | 0.009363 | 2600017H08Rik 2610205L13Rik Spbc25                  |
| 38                                                                                                                                                                                               | Kif22       | -1.89 | 6.44E-05 | 0.009363 | AU021460 C81217 Kid Kif22a                          |
| 39                                                                                                                                                                                               | Tcf19       | -1.50 | 6.58E-05 | 0.009416 | 5730403J10Rik AW495861                              |
| 40                                                                                                                                                                                               | Mad2l1      | -1.14 | 6.72E-05 | 0.009416 | AA673185 MAD2                                       |
| 41                                                                                                                                                                                               | Cxcr3       | -2.33 | 7.37E-05 | 0.009846 | Cd183 Cmkar3                                        |
| 42                                                                                                                                                                                               | Igkv3-10    | -1.93 | 7.74E-05 | 0.010022 | NA                                                  |
| 43                                                                                                                                                                                               | Pbk         | -2.26 | 7.84E-05 | 0.010022 | 2810434B10Rik AW538537 D14Ertd732e TOPK             |
| 44                                                                                                                                                                                               | Ighv1-47    | -5.14 | 8.04E-05 | 0.010035 | NA                                                  |
| 45                                                                                                                                                                                               | Dnpep       | -1.03 | 8.16E-05 | 0.010078 | AA407814                                            |



|               |        |                      |          |          |                                                      |
|---------------|--------|----------------------|----------|----------|------------------------------------------------------|
| 46            | Srm    | -0.92                | 0.000088 | 0.010211 | AA407669 SpdST SpdSy                                 |
| 47            | Gstp2  | -1.30                | 9.19E-05 | 0.010345 | GSTpiA Gst-3 Gst3                                    |
| 48            | Tmem97 | -1.47                | 9.61E-05 | 0.010583 | 1810014L12Rik AI115531 AL022956 D11Bhm<br>182e       |
| 49            | Shcbp1 | -1.71                | 9.65E-05 | 0.010583 | mPAL                                                 |
| 50            | Cenpe  | -1.81                | 9.77E-05 | 0.010583 | 312kDa AU019344 BC049989 C530022J18 CE<br>NP-E Kif10 |
| Abbreviations |        |                      |          |          |                                                      |
| LogFC         |        | Log2 of fold change  |          |          |                                                      |
| FDR           |        | False Discovery Rate |          |          |                                                      |

A

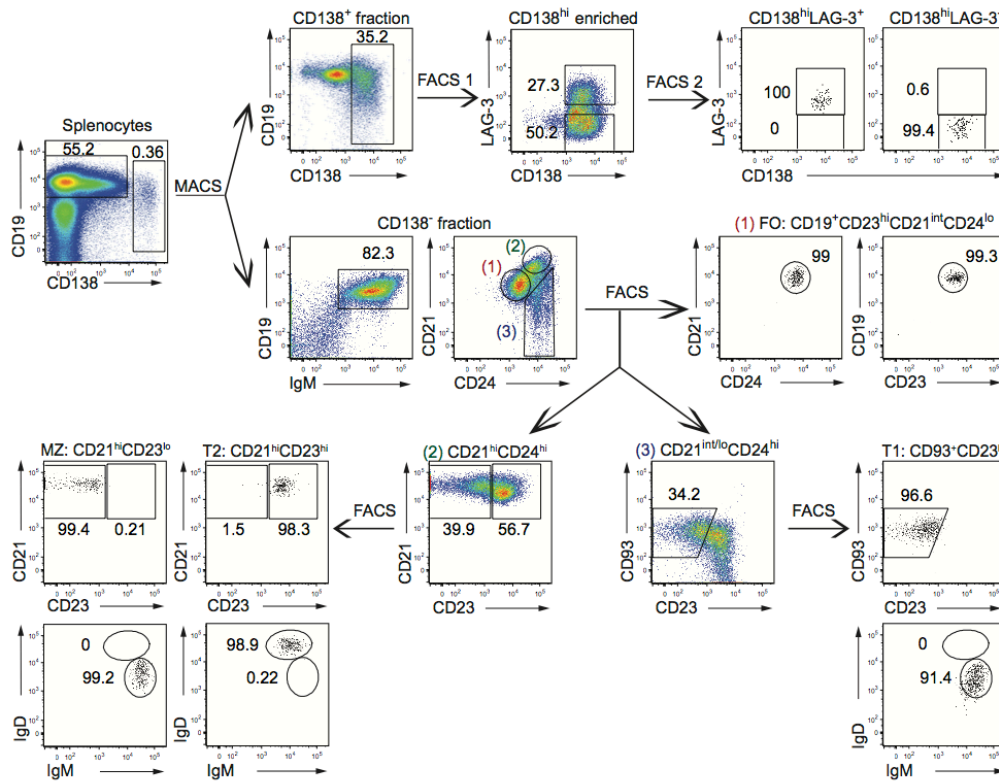

B

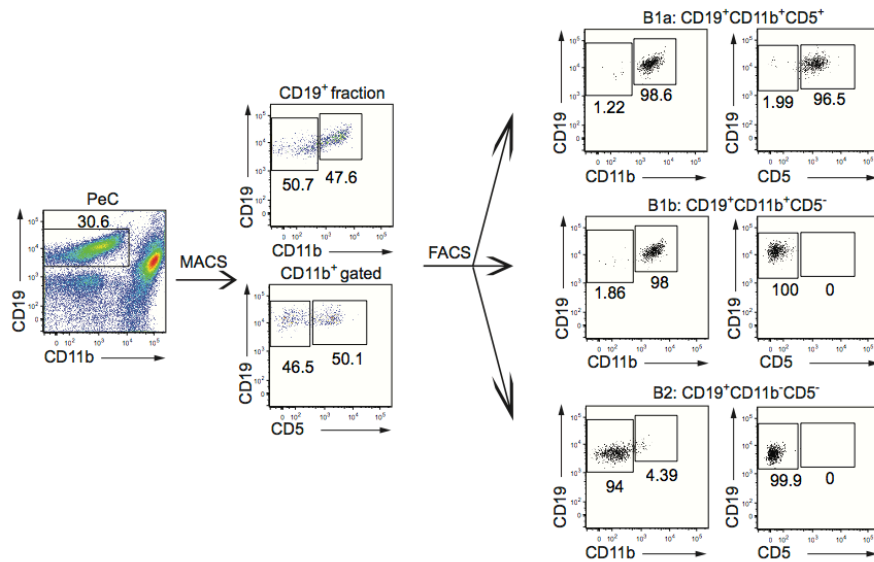

### Methods S1: Strategy for the isolation of B lineage cell subsets, Related to STAR Methods

The isolation of spleen and PeC subsets are illustrated in panels A and B, respectively. For spleen, CD138<sup>+</sup> cells were first enriched by autoMACS after incubation with anti-CD138-PE (clone 281-2, BD Pharmingen) followed by anti-PE microbeads (Miltenyi Biotec). The CD138<sup>+</sup> fraction was then stained with anti-CD19, CD138, LAG-3, and CD11b/CD11c/CD3/PI. An additional enrichment of CD138<sup>hi</sup> cells was performed by flow cytometry sort (FACS 1), and LAG-3<sup>+</sup>CD138<sup>hi</sup>CD11b-CD11c-CD3-PI<sup>-</sup> and LAG-3-CD138<sup>hi</sup>CD11b-CD11c-CD3-PI<sup>-</sup> cells were then isolated by a second flow cytometry sort (FACS 2). Plasmacytes were isolated on

day 1 p.i. with  $10^7$  CFU *Salmonella* (SL7207) using the same strategy, according to LAG-3<sup>+</sup>, LAG-3<sup>-</sup>, *I110eGFP*<sup>+</sup> and *I110eGFP*<sup>-</sup> phenotypes. FMO controls were used to identify the LAG-3<sup>+</sup> and *I110eGFP*<sup>+</sup> subsets. B cell subsets were isolated from the CD138<sup>-</sup> fraction obtained after autoMACS. First, T cells were depleted from the CD138<sup>-</sup> fraction by autoMACS. Follicular B cells (FO) (fraction 1 in the CD21 versus CD24 flow cytometry plot) were then isolated from this T cell-depleted CD138<sup>-</sup> fraction by flow cytometry as CD19<sup>+</sup>CD23<sup>hi</sup>CD21<sup>int</sup>CD24<sup>lo</sup>CD11b<sup>-</sup>CD11c<sup>-</sup>CD3<sup>-</sup>PI<sup>-</sup> following staining with anti-CD19, CD21, CD23, CD24, CD11b/CD11c/CD3/PI. To obtain the other B cell subsets, the T cell-depleted CD138<sup>-</sup> fraction was stained with anti-CD19, IgM, IgD, CD21, CD23, CD24, CD93, and CD11b/CD11c/CD3/PI. Then, the fractions (2) CD19<sup>+</sup>IgM<sup>+</sup>CD21<sup>hi</sup>CD24<sup>hi</sup>CD11b<sup>-</sup>CD11c<sup>-</sup>CD3<sup>-</sup>PI<sup>-</sup> and (3) CD19<sup>+</sup>IgM<sup>+</sup>CD21<sup>lo/int</sup>CD24<sup>hi</sup>CD11b<sup>-</sup>CD11c<sup>-</sup>CD3<sup>-</sup>PI<sup>-</sup> were enriched by flow cytometry. The marginal zone (MZ) CD24<sup>hi</sup>CD21<sup>hi</sup>CD23<sup>lo</sup> and transitional 2 (T2) CD24<sup>hi</sup>CD21<sup>hi</sup>CD23<sup>hi</sup> were then sorted from fraction (2), and the transitional 1 (T1) CD24<sup>hi</sup>CD21<sup>lo/int</sup>CD23<sup>lo</sup>CD93<sup>+</sup> from the fraction (3) by flow cytometry. For PeC, B cells were first purified by autoMACS via CD19-positive selection, then stained with anti-CD19, CD11b, CD5, CD11c, CD3, and PI. B1a: CD19<sup>+</sup>CD11b<sup>+</sup>CD5<sup>+</sup>CD11c<sup>-</sup>CD3<sup>-</sup>PI<sup>-</sup>; B1b: CD19<sup>+</sup>CD11b<sup>+</sup>CD5<sup>-</sup>CD11c<sup>-</sup>CD3<sup>-</sup>PI<sup>-</sup> and B2: CD19<sup>+</sup>CD11b<sup>-</sup>CD5<sup>-</sup>CD11c<sup>-</sup>CD3<sup>-</sup>PI<sup>-</sup> were then flow cytometry-sorted.
